# Supplementary material for: The hypertrophic cardiomyopathy mutations R403Q and R663H increase the number of myosin heads available to interact with actin
Source: PubMed Central journal article supplement — Sci Adv. 2020 Apr 3;6(14):eaax0069. doi: 10.1126/sciadv.aax0069 (PMC7124958; doi:10.1126/sciadv.aax0069), 2020-04-03
Supplement: aax0069_SM.pdf [file aax0069_SM.pdf]

[advances.sciencemag.org/cgi/content/full/6/14/eaax0069/DC1](https://advances.sciencemag.org/cgi/content/full/6/14/eaax0069/DC1)

## Supplementary Materials for

### **The hypertrophic cardiomyopathy mutations R403Q and R663H increase the number of myosin heads available to interact with actin**

Saswata S. Sarkar, Darshan V. Trivedi, Makenna M. Morck, Arjun S. Adhikari, Shaik N. Pasha, Kathleen M. Ruppel\*, James A. Spudich\*

\*Corresponding author. Email: [jspudich@stanford.edu](mailto:jspudich@stanford.edu) (J.A.S.); [kruppel@stanford.edu](mailto:kruppel@stanford.edu) (K.M.R.)

Published 3 April 2020, *Sci. Adv.* **6**, eaax0069 (2020)  
DOI: 10.1126/sciadv.aax0069

#### **This PDF file includes:**

Tables S1 to S4  
Figs. S1 to S3

**Table S1. Summary of mechano-chemical properties of human  $\beta$ -cardiac R663H sS1 and R403Q sS1.**

| HCM mutation | Intrinsic force mutant/WT ratio | Velocity mutant/WT ratio | ATPase mutant/WT ratio |
|--------------|---------------------------------|--------------------------|------------------------|
| R403Q        | $0.8 \pm 0.1$                   | $1.2 \pm 0.1$            | $1.2 \pm 0.1$          |
| R663H        | $1.1 \pm 0.1$                   | $1.02 \pm 0.02$          | $0.9 \pm 0.1$          |

The ratios of mutant/WT for basic mechano-chemical properties of sS1 are presented. The data for human  $\beta$ -cardiac R403Q sS1 is taken from our published data (28).

**Table S2. Actin-activated ATPase activity values for human  $\beta$ -cardiac 2-hep HMM and 25-hep HMM.**

|       | 2-hep HMM<br>$k_{cat}$<br>( $s^{-1}$ ) | 2-hep HMM<br>$K_M$<br>( $\mu M$ ) | 25-hep HMM<br>$k_{cat}$<br>( $s^{-1}$ ) | 25-hep HMM<br>$K_M$<br>( $\mu M$ ) | 25-hep HMM:2-hep HMM<br>(%) |
|-------|----------------------------------------|-----------------------------------|-----------------------------------------|------------------------------------|-----------------------------|
| WT    | $2.4 \pm 0.1$                          | $4 \pm 1$                         | $1.4 \pm 0.1$                           | $9 \pm 2$                          | $57 \pm 3$                  |
| R403Q | $2.7 \pm 0.2$                          | $20 \pm 3$                        | $2.2 \pm 0.2$                           | $27 \pm 6$                         | $80 \pm 8$                  |
| R663H | $2.8 \pm 0.2$                          | $6 \pm 1$                         | $1.9 \pm 0.1$                           | $6 \pm 2$                          | $67 \pm 3$                  |

The values of  $k_{cat}$  and  $K_M$  were obtained from the fitting of data shown in Fig. 3A (R403Q) and 3B (R663H). WT values were obtained from our previous work (8).

**Table S3. Summary of mant-ATP single turnover data of myosin.**

|       | SRX rate (1/s)  | % of SRX | DRX rate (1/s) | % of DRX |
|-------|-----------------|----------|----------------|----------|
| WT    | 0.0038 ± 0.0003 | 45 ± 3   | 0.020 ± 0.003  | 55 ± 3   |
| R403Q | 0.0024 ± 0.0005 | 21 ± 6   | 0.016 ± 0.002  | 79 ± 6   |
| R663H | 0.0027 ± 0.0005 | 18 ± 3   | 0.027 ± 0.004  | 82 ± 3   |

The mean SRX and DRX rates and the mean percentages of myosin heads in SRX and DRX are reported with SEM for human  $\beta$ -cardiac WT, R663H and R403Q 25-hep HMM. The p values for WT and R403Q are 0.06 and 0.23 for SRX and DRX rates, respectively. The p values for WT and R663H are 0.10 and 0.15 for SRX and DRX rates, respectively.

**Table S4. Summary of mant-ATP single turnover data of myosin and MyBP-C.**

|               | SRX rate (1/s)  | % of SRX | DRX rate (1/s) | % of DRX |
|---------------|-----------------|----------|----------------|----------|
| WT + C0-C7    | 0.0054 ± 0.0004 | 81 ± 7   | 0.040 ± 0.007  | 19 ± 7   |
| R403Q + C0-C7 | 0.0035 ± 0.0005 | 29 ± 4   | 0.018 ± 0.001  | 71 ± 4   |
| R663H + C0-C7 | 0.0038 ± 0.0007 | 26 ± 3   | 0.025 ± 0.002  | 74 ± 3   |

The mean SRX and DRX rates and the mean percentages of myosin heads in SRX and DRX are reported with SEM for human  $\beta$ -cardiac WT, R663H and R403Q 25-hep HMM with 10  $\mu$ M C0-C7. The p values for WT and R403Q are 0.01 and 0.05 for SRX and DRX rates, respectively. The p values for WT and R663H are 0.10 and 0.13 for SRX and DRX rates, respectively.

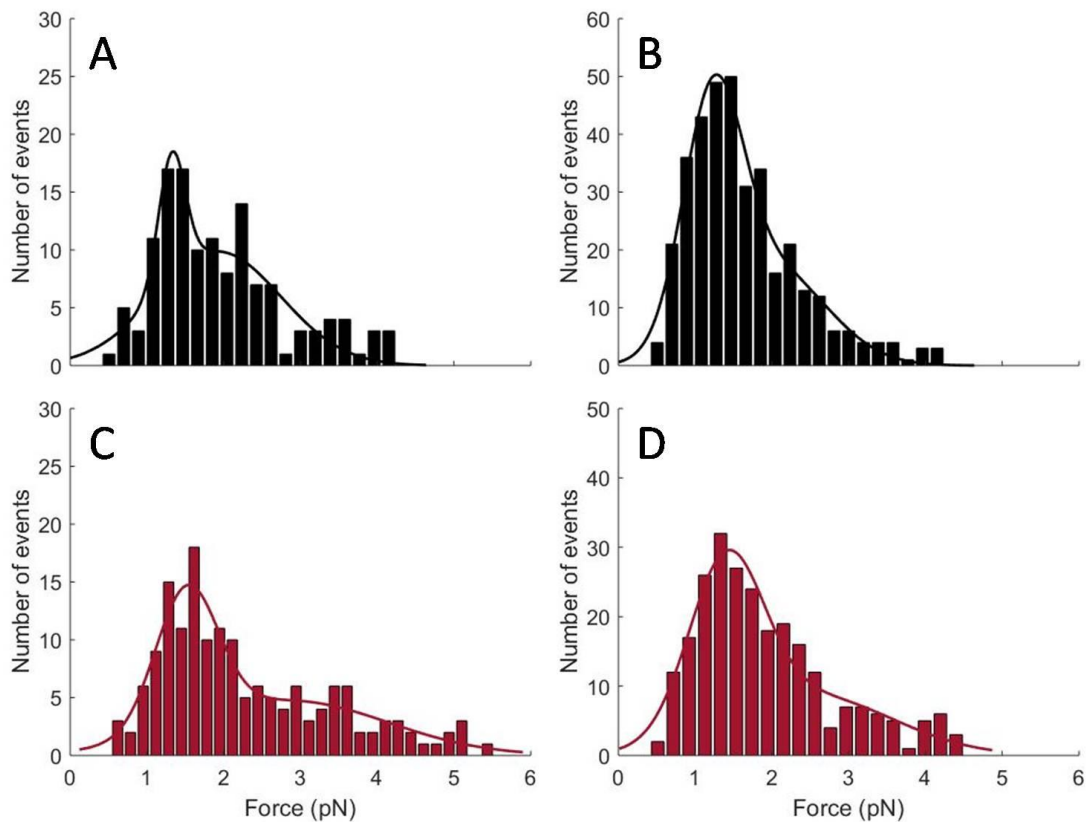

**Fig. S1. Intrinsic force measurements of WT and R663H human  $\beta$ -cardiac sS1.** (A-D) The data from Fig. 1B represented as force histograms. (A) Force histogram of a representative molecule of WT human  $\beta$ -cardiac sS1. (B) Cumulative distribution of four molecules of WT (number of events = 362). (C) Force histogram of a representative molecule of R663H human  $\beta$ -cardiac sS1. (D) Cumulative distribution of four molecules of R663H (number of events = 304). Each of the distributions was fitted to a double-Gaussian function and the fittings are shown.

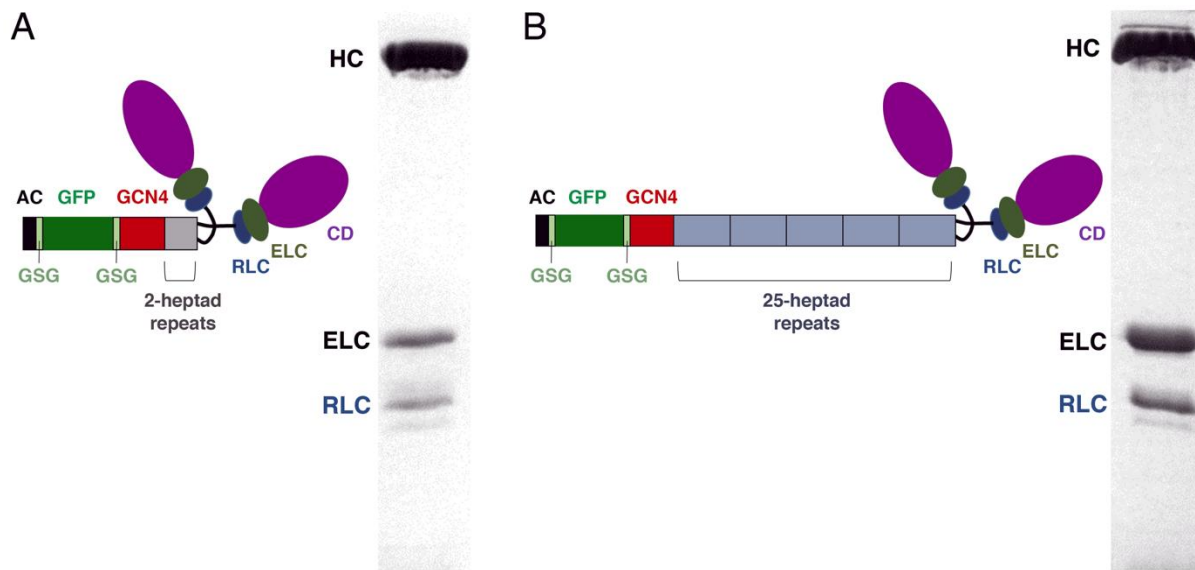

**Fig. S2. SDS-PAGE gel images and schematic structures of human  $\beta$ -cardiac 2-hep HMM and 25-hep HMM.** Each construct has 2 heavy chains, 2 ELCs and 2 RLCs. (A) Human  $\beta$ -cardiac 2-hep HMM has 2-heptad repeats of S2 whereas (B) 25-hep HMM has 25-heptad repeats. The C-terminus of each construct has 1 leucine zipper (GCN4) followed by an e-GFP and an 8-residue (RGSIDTWV) PDZ-binding peptide (AC). There are flexible (GSG) linkers between GCN4 and GFP, and between GFP and AC. The gels were 15% acrylamide.

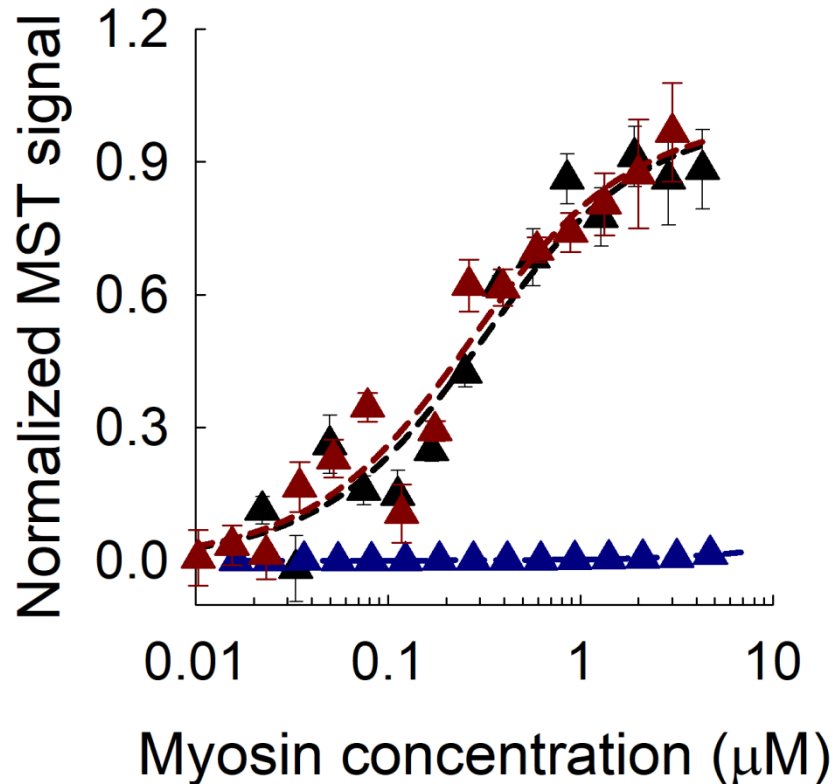

**Fig. S3. Binding data of human  $\beta$ -cardiac 25-hep HMM with the C0-C7 fragment of MyBP-C.** Representative Microscale Thermophoresis (MST) binding curves of human  $\beta$ -cardiac 25-hep HMM with the C0-C7 fragment of MyBP-C for WT (black), R663H (dark red) and R403Q (blue) are shown. Experiments were performed by mixing 50 nM labeled C0-C7 with different concentrations of 25-hep HMM. In this particular dataset, the  $K_d$  values obtained from data fitting are 280 nM and 250 nM for WT and R663H, respectively. For R403Q, 25-hep HMM showed no binding to C0-C7 up to 5  $\mu$ M 25-hep HMM. Data points represent the mean at each C0-C7 concentration with the SEM shown. The data are the average of 3 experiments from a single set of protein preparations.
